# Supplementary material for: Remarkably High-Performance Nanosheet GeSn Thin-Film Transistor
Source: MDPI journal article supplement (doi:10.3390/nano12020261), 2022-01-14
Supplement: s1 [file s1]

Supplementary Material

# Remarkably High-Performance Nanosheet GeSn Thin-Film Transistor

Te Jui Yen <sup>1</sup>, Albert Chin <sup>1,\*</sup>, Weng Kent Chan <sup>2</sup>, Hsin-Yi Tiffany Chen <sup>2</sup> and Vladimir Gritsenko <sup>3,4,5</sup>

<sup>1</sup> Department of Electronics Engineering, National Yang Ming Chiao Tung University, Hsinchu 300, Taiwan; yenrick42269.ee05g@g2.nctu.edu.tw

<sup>2</sup> Department of Engineering and System Science, National Tsing Hua University, Hsinchu 300, Taiwan; kentchan00543@gapp.nthu.edu.tw (W.K.C.); hsinyi.tiffany.chen@gapp.nthu.edu.tw (H.-Y.T.C.)

<sup>3</sup> Rzhzanov Institute of Semiconductor Physics, Siberian Branch, Russian Academy of Sciences, 630090 Novosibirsk, Russia; grits@isp.nsc.ru

<sup>4</sup> Novosibirsk State University, 2 Pirogov Street, 630090 Novosibirsk, Russia

<sup>5</sup> Novosibirsk State Technical University, 20 Marks Avenue, 630073 Novosibirsk, Russia

\* Correspondence: achin@nycu.edu.tw; Tel.: +886-3-5731841

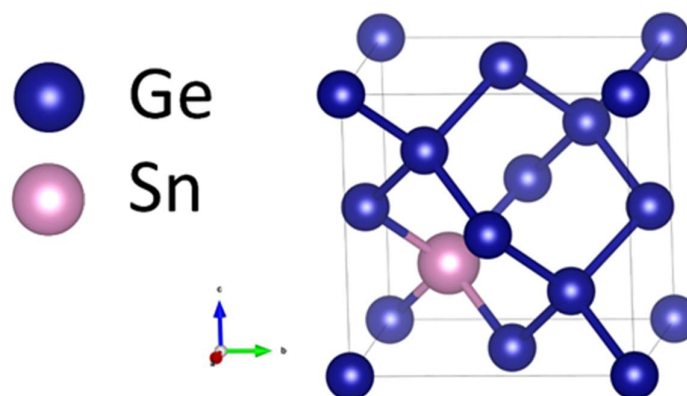

**Figure S1.** Optimized structure of the diamond cubic  $\text{Ge}_{0.875}\text{Sn}_{0.125}$  model with the lattice constant of 5.763 Å, containing eight atoms by first-principles calculations.

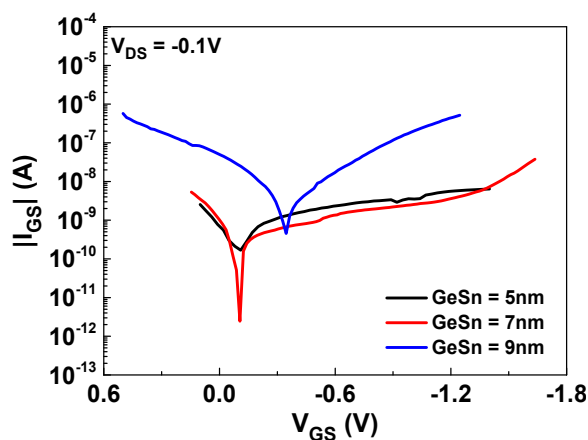

**Figure S2.** The  $|I_{GS}|$ – $V_{GS}$  characteristics of the GeSn/SiO<sub>2</sub>/HfO<sub>2</sub> pTFTs with different channel thickness.

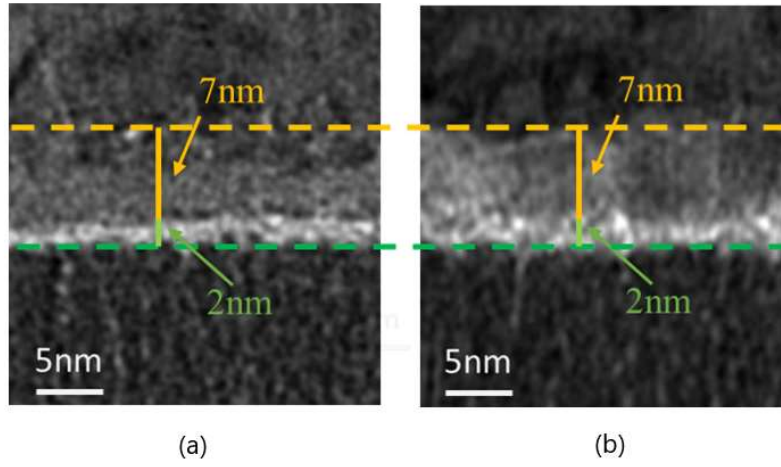

**Figure S3.** The cross-sectional TEM image of GeSn pTFT with GeSn annealed at (a) 300 and (b) 350 °C.

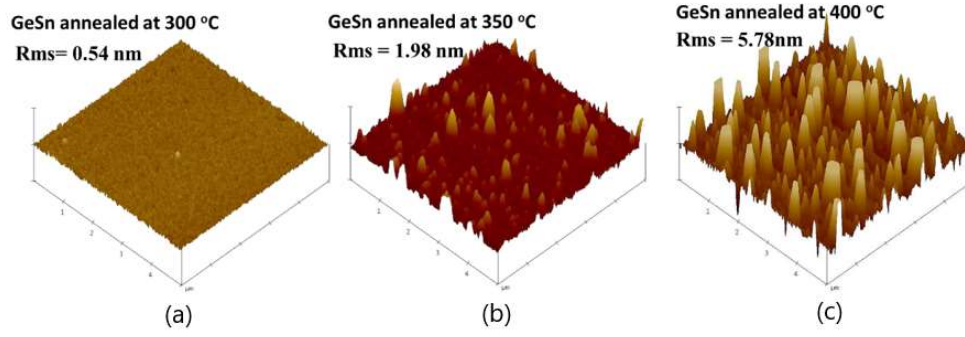

**Figure S4.** The surface roughness of GeSn films annealed at (a) 300 °C, (b) 350 °C and (c) 400 °C measured by AFM.

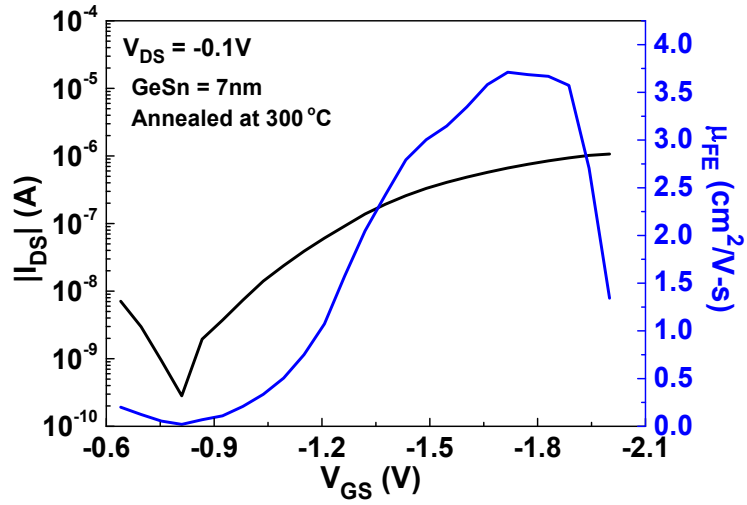

**Figure S5.** The  $|I_{DS}|$ - $V_{GS}$  and  $\mu_{FE}$ - $V_{GS}$  characteristics of the GeSn pTFTs with 7nm channel thickness and annealed at 300 °C.

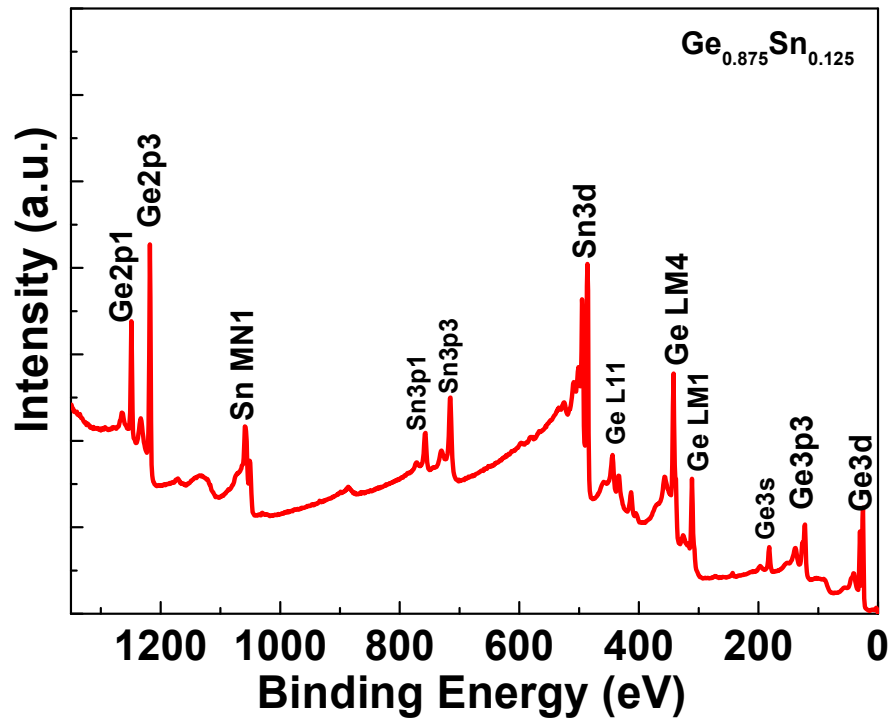

Figure S6. The XPS spectrum of  $\text{Ge}_{0.875}\text{Sn}_{0.125}$ .

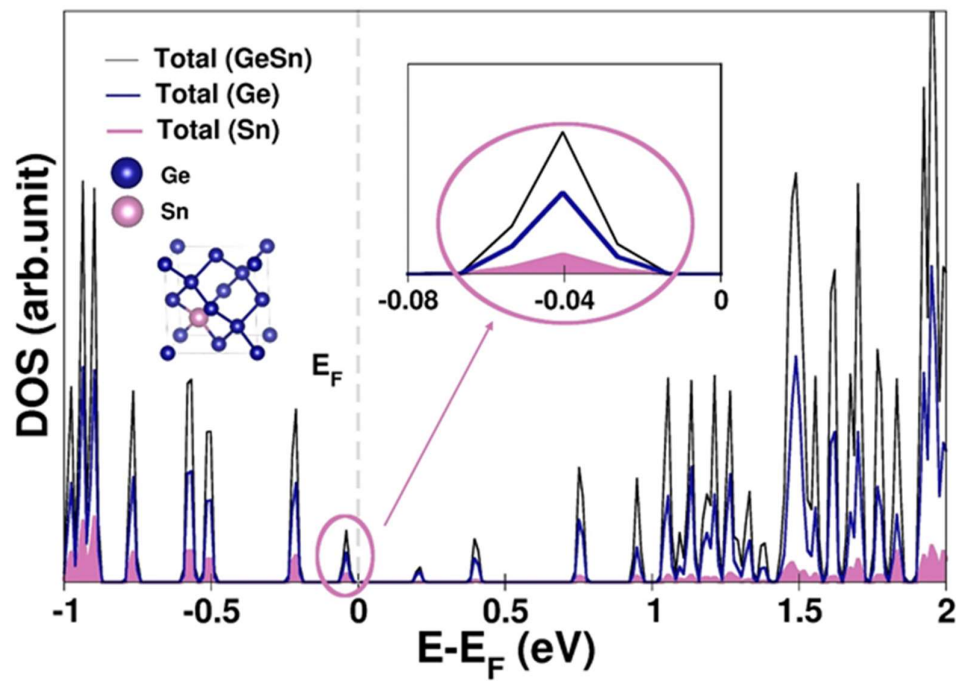

Figure S7. Total density of state (DOS) and projected DOS of Ge and Sn of  $\text{Ge}_{0.875}\text{Sn}_{0.125}$  by first-principles calculations.
